# Supplementary material for: Anti-inflammatory potential of digested Brassica sprout extracts in human macrophage-like HL-60 cells
Source: Royal Society of Chemistry journal article supplement (doi:10.1039/d2fo02914f), 2022-12-02
Supplement: d2fo02914f1.pdf [file d2fo02914f1.pdf]

Figure S1. mRNA relative expression levels of genes involved in immune response of HL-60 differentiated cells exposed to red radish sprouts (RRS) or red cabbage sprouts (RCS) extract digestates ( $100 \mu\text{g mL}^{-1}$ ). *P*-values were calculated using the t-student test. Values are expressed as fold-change to the control. Results are represented as mean  $\pm$  SD from three different assays with three replicates performed in each assay condition. \**p* < 0.05, \*\* *p* < 0.01.

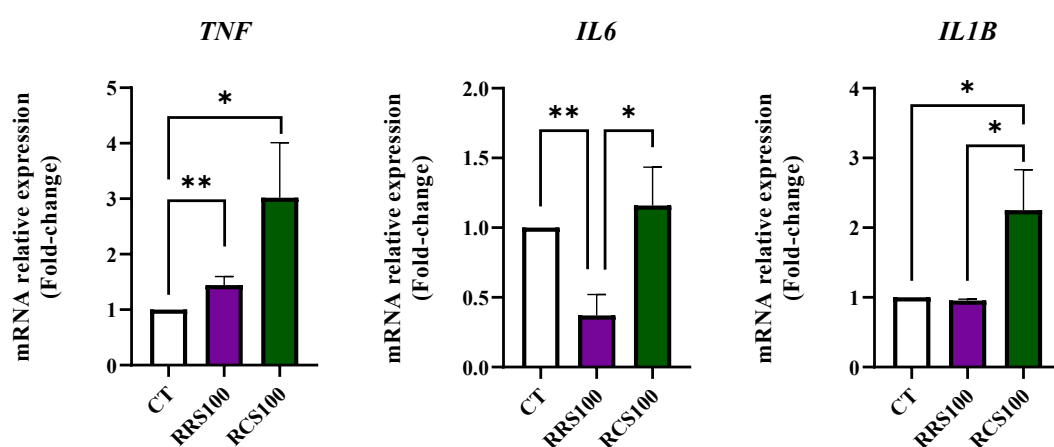

Table S1. Primer sequences

| <b>Gene name</b>                                | <b>Official gene symbol<sup>a</sup></b> | <b>mRNA Accession</b> | <b>Forward</b>           | <b>Reverse</b>          |
|-------------------------------------------------|-----------------------------------------|-----------------------|--------------------------|-------------------------|
| <b>Tumor necrosis factor</b>                    | <i>TNF</i>                              | NM_000594.4           | gaggccaagccctggtatg      | cgggccgattgatctcagc     |
| <b>Interleukin 6</b>                            | <i>IL6</i>                              | NM_0006005            | actcacctcttcagaacgaat tg | ccatctttggaagggtcagggtg |
| <b>Interleukin 1 beta</b>                       | <i>IL1B</i>                             | NM_000576.3           | atgatggcttattacagtggcaa  | gtcggagattcgtagctgga    |
| <b>Glyceraldehyde-3-phosphate dehydrogenase</b> | <i>GAPDH</i>                            | NM_002046.7           | tccaccaccctgttctgta      | accacagtccatgccatcac    |

<sup>a</sup> HGNC, Hugo Gene Nomenclature Committee.
